# Supplementary material
Source: PubMed Central journal article supplement (PMC2724318)
Supplement: NIHMS96654-supplement-pdf.pdf [file NIHMS96654-supplement-pdf.pdf]

## Supporting Information

### **<sup>1</sup>H NMR study of the effect of variable ligand on heme oxygenase electronic and molecular structure**

*Li-Hua Ma<sup>a</sup>, Yangzhong Liu<sup>a†</sup>, Xuhong Zhang<sup>b</sup>, Tadashi Yoshida<sup>b</sup> and Gerd N. La Mar<sup>a\*</sup>*

Two tables of chemical shifts for all assigned residues and six Figures (TOCSY spectra for aromatic and upfield residues, NOESY spectra for the H-bond network, for His C<sub>β</sub>Hs in <sup>2</sup>H<sub>2</sub>O and Curie plot comparison with *Nm*HO-PH-CN). Total 16 Pages

**Table S1.** Substrate chemical shifts for *NmHO-PH-X*\*

|                  | X = N <sub>3</sub> <sup>-</sup> | X <sup>†</sup> = CN <sup>-</sup> |
|------------------|---------------------------------|----------------------------------|
| 1CH <sub>3</sub> | 18.83                           | 7.90                             |
| 2H <sub>α</sub>  | 9.50                            | 14.48                            |
| 2H <sub>βS</sub> |                                 | -5.58, -6.62                     |
| 3CH <sub>3</sub> | 8.05                            | 21.40                            |
| 4H <sub>α</sub>  | 11.95                           | 8.06                             |
| 4H <sub>βS</sub> | -6.42, -6.81                    | -2.80, -3.38                     |
| 5CH <sub>3</sub> | 18.33                           | 9.62                             |
| 6H <sub>αS</sub> | 10.00, 2.51                     | 16.92, 1.14                      |
| 6H <sub>βS</sub> |                                 | -1.02, -3.38                     |
| 7H <sub>αS</sub> | 9.95, 6.12                      | 13.06, 5.73                      |
| 7H <sub>βS</sub> |                                 | -1.10, -2.17                     |
| 8CH <sub>3</sub> | 20.25                           | 10.33                            |

\*In ppm, referenced to DSS via the solvent resonance; <sup>1</sup>H<sub>2</sub>O 50(100) mM in phosphate for azide (cyanide), pH 7.1 at 25°C.

†Taken from Ref.: Y. Liu, X. Zhang, T. Yoshida, G. N. La Mar, *Biochemistry* 43 (2004) 10112-10126.

**Table S2.** Chemical shift data for assigned residues in *NmHO-PH-X*.\*

|        |                                | X = N <sub>3</sub> <sup>-</sup>             |                                          | X = CN <sup>-</sup>                          | Shift differences                            |                                                      |
|--------|--------------------------------|---------------------------------------------|------------------------------------------|----------------------------------------------|----------------------------------------------|------------------------------------------------------|
|        |                                | $\delta_{\text{DSS}}(\text{obs})^{\dagger}$ | $\delta_{\text{dip}}(\text{calc})^{\pm}$ | $\delta_{\text{DSS}}(\text{obs})^{\ddagger}$ | $\Delta\delta_{\text{DSS}}(\text{obs})^{\S}$ | $\Delta\delta_{\text{dip}}(\text{calc})^{\parallel}$ |
| Phe 11 | NH                             | 7.60                                        | -0.09                                    | 7.50                                         | 0.10                                         | 0.03                                                 |
|        | C <sub>α</sub> H               |                                             | -0.07                                    | 4.37                                         | 0.03                                         | -0.02                                                |
|        | C <sub>δ</sub> Hs              | 7.05                                        | -0.11                                    | 7.03                                         | 0.02                                         | 0.00                                                 |
|        | C <sub>ε</sub> Hs              | 6.88                                        | -0.13                                    | 6.90                                         | -0.02                                        | -0.03                                                |
|        | C <sub>ζ</sub> H               | 6.67                                        | -0.15                                    | 6.76                                         | -0.09                                        | -0.04                                                |
| Ala12  | NH                             | 9.04                                        | -0.16                                    | 8.96                                         | 0.08                                         | 0.05                                                 |
|        | C <sub>α</sub> H               | 3.38                                        | -0.26                                    | 3.30                                         | 0.08                                         | 0.06                                                 |
|        | C <sub>β</sub> H <sub>3</sub>  | 1.17                                        | -0.29                                    | 1.02                                         | 0.15                                         | 0.11                                                 |
| Leu15  | C <sub>γ</sub> H               | 0.54                                        | -0.12                                    | 0.57                                         | -0.03                                        | -0.03                                                |
|        | C <sub>δ1</sub> H <sub>3</sub> | -0.65                                       | -0.28                                    | -0.65                                        | 0.00                                         | -0.03                                                |
|        | C <sub>δ2</sub> H <sub>3</sub> | 0.11                                        | -0.14                                    | 0.21                                         | -0.10                                        | -0.10                                                |
| Asp18  | NH                             | 8.60                                        | 0.34                                     | 8.64                                         | -0.04                                        | -0.02                                                |
|        | C <sub>α</sub> H               | 4.91                                        | 0.43                                     | 4.97                                         | -0.06                                        | -0.05                                                |
|        | C <sub>β1</sub> H              | 2.87                                        | 0.29                                     | 2.95                                         | -0.08                                        | -0.09                                                |
|        | C <sub>β2</sub> H              | 2.78                                        | 0.26                                     | 2.85                                         | -0.07                                        | -0.03                                                |
| Thr19  | NH                             | 7.98                                        | 0.75                                     | 8.04                                         | -0.06                                        | -0.10                                                |
|        | C <sub>α</sub> H               | 5.28                                        | 0.93                                     | 5.52                                         | -0.24                                        | -0.20                                                |
|        | C <sub>β</sub> H               | 5.23                                        | 1.03                                     | 5.75                                         | -0.52                                        | -0.50                                                |
|        | C <sub>γ</sub> H <sub>3</sub>  | 1.41                                        | 0.43                                     | 1.70                                         | -0.29                                        | -0.20                                                |
|        | O <sub>η</sub> H               | 5.60                                        | 0.36                                     | 5.90                                         | -0.28                                        | -0.30                                                |
| Thr20  | NH                             | 8.38                                        | 1.30                                     | 8.37                                         | 0.01                                         | -0.09                                                |
|        | C <sub>α</sub> H               | 6.38                                        | 3.45                                     | 6.30                                         | 0.08                                         | -0.15                                                |
|        | C <sub>β</sub> H               | 5.25                                        | 1.37                                     | 5.14                                         | 0.11                                         | 0.01                                                 |

|       |                                |       |       |       |       |       |
|-------|--------------------------------|-------|-------|-------|-------|-------|
|       | C <sub>γ</sub> H <sub>3</sub>  | 2.41  | 2.11  | 2.27  | 0.14  | 0.10  |
| Ala21 | NH                             | 9.27  | 1.36  | 9.36  | -0.09 | -0.12 |
|       | C <sub>α</sub> H               | 5.23  | 1.43  | 5.31  | -0.08 | -0.11 |
|       | C <sub>β</sub> H <sub>3</sub>  | 1.97  | 0.89  | 2.04  | -0.07 | -0.09 |
| Val22 | NH                             | 9.14  | 1.40  | 9.44  | -0.30 | -0.24 |
|       | C <sub>α</sub> H               | 4.60  | 1.11  | 4.87  | -0.27 | -0.21 |
|       | C <sub>β</sub> H               | 2.44  | 0.79  | 2.72  | -0.28 | -0.23 |
|       | C <sub>γ1</sub> H <sub>3</sub> | 1.04  | 1.15  | 1.56  | -0.52 | -0.44 |
|       | C <sub>γ2</sub> H <sub>3</sub> | 1.17  | 0.60  | 1.40  | -0.23 | -0.20 |
| His23 | NH                             | 10.54 | 3.10  | 11.08 | -0.54 | -0.57 |
|       | C <sub>α</sub> H               | 6.25  | 4.82  | 7.37  | -1.12 | -1.38 |
|       | C <sub>β1</sub> H              | 12.50 |       | 11.53 | **    |       |
|       | C <sub>β2</sub> H              | 9.54  |       | 10.75 | **    |       |
| Asp24 | NH                             | 11.07 | 4.13  | 11.41 | -0.34 | -0.27 |
|       | C <sub>α</sub> H               | 6.44  | 3.65  | 6.80  | -0.36 | -0.20 |
|       | C <sub>β1</sub> H              | 3.52  | 1.59  | 3.65  | -0.13 | -0.10 |
|       | C <sub>β2</sub> H              | 4.14  | 2.02  | 4.30  | -0.16 | -0.13 |
| Ser25 | NH                             | 8.60  | 1.85  | 8.77  | -0.17 | -0.17 |
| Val26 | NH                             | 8.28  | 1.42  | 8.33  | -0.05 | -0.08 |
|       | C <sub>α</sub> H               | 3.12  | -0.27 | 2.80  | 0.32  | 0.27  |
|       | C <sub>β</sub> H               | 1.57  | 0.64  | 1.60  | -0.03 | 0.05  |
|       | C <sub>γ1</sub> H <sub>3</sub> | -0.98 | -2.41 | -1.96 | 0.98  | 0.94  |
|       | C <sub>γ2</sub> H <sub>3</sub> | 0.43  | -0.09 | 0.51  | -0.08 | -0.13 |
| Val30 | NH                             | 8.38  | -0.87 | 7.87  | 0.51  | 0.52  |
|       | C <sub>α</sub> H               | 2.92  | -0.70 | 2.46  | 0.46  | 0.42  |
|       | C <sub>β</sub> H               | 1.40  | -1.64 | 0.40  | 1.00  | 0.90  |
|       | C <sub>γ1</sub> H <sub>3</sub> | 0.40  | -0.97 | -0.68 | 1.04  | 0.67  |

|        |                   |       |       |       |       |       |
|--------|-------------------|-------|-------|-------|-------|-------|
|        | $C_{\gamma 2}H_3$ | 0.44  | -1.49 | -0.21 | 0.65  | 0.93  |
| Val33  | NH                | 6.84  | -0.34 | 6.54  | 0.30  | 0.18  |
|        | $C_{\alpha}H$     | 4.18  | -0.19 | 4.05  | 0.13  | 0.11  |
|        | $C_{\beta}H$      | 1.78  | -0.21 | 1.62  | 0.16  | 0.13  |
|        | $C_{\gamma 1}H_3$ | 0.45  | -0.23 | 0.29  | 0.16  | 0.13  |
|        | $C_{\gamma 2}H_3$ | -0.34 | -0.34 | -0.55 | 0.21  | 0.20  |
| Tyr42  | $C_{\epsilon}H_s$ | 6.94  | 0.20  | 6.79  | 0.15  | 0.08  |
|        | $O_{\eta}H$       | 9.20  | 0.32  | 9.16  | 0.04  | 0.07  |
| Phe45  | $C_{\delta}H_s$   | 7.12  | -0.09 | 6.77  | 0.35  | 0.27  |
|        | $C_{\epsilon}H_s$ | 7.83  | -0.03 | 7.23  | 0.60  | 0.48  |
|        | $C_{\zeta}H_s$    | 8.15  | 0.37  | 7.34  | 0.79  | 0.61  |
| Leu48  | $C_{\alpha}H$     | 3.65  | -0.20 | 3.50  | 0.15  | 0.12  |
|        | $C_{\gamma}H$     | 1.15  | -0.42 | 0.80  | 0.35  | 0.19  |
|        | $C_{\delta 1}H_3$ | -0.25 | -0.42 | -0.50 | 0.25  | 0.28  |
| Gln49  | $N_{\epsilon 1}H$ | 10.97 | 0.55  | 10.14 | 0.83  | 0.35  |
|        | $N_{\epsilon 2}H$ | 7.76  | 0.75  | 7.35  | 0.41  | 0.56  |
| Phe52  | $C_{\delta}H_s$   | 6.53  | -0.52 | 6.55  | -0.02 | -0.03 |
|        | $C_{\epsilon}H_s$ | 6.50  | -0.81 | 6.71  | -0.21 | -0.20 |
|        | $C_{\zeta}H$      | 6.08  | -1.02 | 6.41  | -0.33 | -0.32 |
| His53  | $C_{\delta 1}H$   | 7.66  | 0.18  | 7.44  | 0.22  | 0.09  |
|        | $C_{\epsilon 2}H$ | 8.08  | 0.38  | 7.97  | 0.11  | -0.02 |
|        | $N_{\epsilon 1}H$ | 12.22 | 0.33  | 12.13 | 0.09  | 0.14  |
| Tyr60  | $C_{\epsilon}H_s$ | 6.60  | -0.12 | 6.65  | -0.05 | -0.08 |
|        | $O_{\eta}H$       | 10.36 | -0.05 | 10.43 | -0.07 | -0.08 |
| Trp110 | $C_{\delta 1}H$   | 7.14  | -0.23 | 7.27  | -0.13 | -0.12 |
|        | $N_{\epsilon 1}H$ | 11.40 | -0.19 | 11.52 | -0.12 | -0.11 |
|        | $C_{\epsilon 3}H$ | 6.80  | -0.38 | 6.48  | -0.15 | -0.13 |

|        |                             |       |       |       |       |       |
|--------|-----------------------------|-------|-------|-------|-------|-------|
|        | C $\zeta_2$ H               | 7.17  | -0.20 | 7.27  | -0.10 | -0.09 |
|        | C $\zeta_3$ H               | 6.40  | -0.33 | 6.48  | -0.08 | -0.08 |
|        | C $\eta_2$ H                | 6.30  | -0.25 | 6.38  | -0.08 | -0.08 |
| Leu111 | C $\gamma$ H                | 1.32  | -0.34 | 1.43  | -0.11 | -0.12 |
|        | C $\delta_1$ H <sub>3</sub> | 0.68  | -0.24 | 0.68  | 0.00  | -0.08 |
|        | C $\delta_2$ H <sub>3</sub> | 0.05  | -0.24 | 0.13  | -0.08 | -0.05 |
| Tyr112 | C $\delta$ Hs               | 6.46  | -0.84 | 6.57  | -0.11 | 0.12  |
|        | C $\epsilon$ Hs             | 6.37  | -0.45 | 6.62  | -0.24 | -0.37 |
|        | O $\eta$ H                  | 12.0  | -0.83 | 11.68 | 0.32  | 0.38  |
| Cys113 | NH                          | 7.2   | -0.89 | 7.40  | -0.20 | -0.36 |
|        | C $\alpha$ H                | 1.46  | -2.16 | 2.60  | -1.14 | -0.98 |
|        | C $\beta_1$ H               | 1.75  | -1.08 | 2.32  | -0.57 | -0.47 |
|        | C $\beta_2$ H               | 1.15  | -1.00 | 2.02  | -0.87 | -0.67 |
|        | S $\gamma$ H                | -0.90 | -2.52 | -0.19 | -0.71 | -0.58 |
| Ala114 | NH                          | 7.56  | -1.02 | 8.04  | -0.48 | -0.37 |
|        | C $\alpha$ H                | 3.30  | -1.09 | 3.71  | -0.41 | -0.40 |
|        | C $\beta$ H <sub>3</sub>    | 1.45  | -0.50 | 1.60  | -0.15 | -0.19 |
| Glu115 | NH                          | 8.73  | -0.80 | 9.07  | -0.34 | -0.24 |
|        | C $\alpha$ H                | 3.70  | -0.12 | 3.97  | -0.27 | -0.13 |
| Gly116 | NH                          | 7.63  | -1.72 | 7.9   | -0.32 | -0.30 |
|        | C $\alpha_1$ H              | 0.76  | -3.86 | 0.49  | 0.27  | -0.03 |
|        | C $\alpha_2$ H              | -0.08 | -2.04 | 0.55  | -0.63 | -0.40 |
| Asn118 | NH                          | 8.30  | -1.29 | 8.46  | -0.16 | -0.24 |
| Leu119 | C $\alpha$ H                | 4.35  | 1.05  | 4.72  | -0.37 | 0.09  |
|        | C $\beta_1$ H               | -1.55 | -0.98 | -1.1  | -0.4  | 0.96  |
|        | C $\beta_2$ H               | -0.7  | -0.26 | -0.95 | 0.25  | -0.42 |
|        | C $\gamma$ H                | 0.06  | -1.01 | -0.40 | 0.46  | 0.72  |

|        |                   |       |       |       |       |       |
|--------|-------------------|-------|-------|-------|-------|-------|
|        | $C_{\delta 1}H_3$ | -0.86 | -0.30 | -1.69 | -0.83 | 0.30  |
|        | $C_{\delta 2}H_3$ | -0.08 | -1.89 | -0.63 | 0.55  | 1.01  |
| Ala120 | NH                |       | 6.08  | 13.0  |       | 0.49  |
| Ala121 | NH                | 15.53 | 8.28  | 15.32 | 0.21  | -1.01 |
|        | $C_{\alpha}H$     | 8.55  | 8.90  | 8.52  | 0.03  | -1.04 |
|        | $C_{\beta}H_3$    | 4.95  | 4.85  | 5.44  | -0.49 | -0.33 |
| Ala122 | NH                |       | 3.25  | 9.73  |       | -1.07 |
|        | $C_{\alpha}H$     |       | 1.30  | 4.93  |       | -0.45 |
|        | $C_{\beta}H_3$    |       | 0.69  | 1.98  |       | -0.55 |
| Phe123 | NH                | 7.75  | 1.05  | 8.83  | -1.58 | -1.30 |
|        | $C_{\alpha}H$     | 3.93  | -0.03 | 4.51  | -0.58 | -0.58 |
|        | $C_{\beta 1}H$    | 2.22  | -0.77 | 3.46  | -1.23 | -1.24 |
|        | $C_{\beta 2}H$    | 2.13  | -1.11 | 3.27  | -1.16 | -1.00 |
|        | $C_{\delta}H_s$   | 6.22  | -0.83 | 7.07  | -0.85 | -0.42 |
|        | $C_{\epsilon}H_s$ | 6.47  | -0.71 | 6.94  | -0.47 | -0.18 |
|        | $C_{\zeta}H$      |       | -0.61 | 7.15  |       | -0.11 |
| Leu124 | NH                | 8.05  | 2.15  | 8.09  | -0.04 | -0.65 |
| Phe125 | NH                | 10.10 | 1.38  | 10.00 | 0.10  | -0.28 |
|        | $C_{\alpha}H$     | 4.40  | 0.77  | 4.47  | -0.07 | -0.09 |
|        | $C_{\delta}H_s$   | 7.42  | 0.66  | 7.50  | -0.08 | -0.12 |
| Tyr133 | NH                | 6.96  | 0.14  | 6.97  | 0.01  | -0.01 |
|        | $C_{\alpha}H$     | 5.36  | 0.16  | 5.34  | 0.02  | 0.00  |
|        | $C_{\beta}H$      | 2.36  | 0.21  | 2.32  | 0.04  | 0.01  |
|        | $C_{\beta}H'$     | 3.54  | 0.20  | 3.50  | 0.04  | 0.00  |
|        | $C_{\delta}H_s$   | 6.68  | 0.13  | 6.64  | 0.04  | 0.01  |
|        | $C_{\epsilon}H_s$ | 6.53  | 0.08  | 6.57  | -0.04 | 0.03  |
| His137 | NH                | 7.57  | 0.21  | 7.54  | 0.03  | -0.01 |

|        |                   |       |       |       |       |       |
|--------|-------------------|-------|-------|-------|-------|-------|
|        | $C_{\alpha}H$     | 4.95  | 0.16  | 4.92  | 0.03  | 0.00  |
|        | $C_{\beta}H$      | 3.07  | 0.14  | 3.05  | 0.02  | -0.01 |
|        | $C_{\beta}H'$     | 3.32  | 0.14  | 3.25  | 0.08  | 0.00  |
|        | $C_{\delta}H$     | 7.16  | 0.11  | 7.12  | 0.04  | 0.00  |
| Gly138 | NH                | 10.45 | 0.18  | 10.43 | 0.02  | 0.02  |
|        | $C_{\alpha 1}H$   | 3.92  | 0.18  | 3.87  | 0.05  | 0.02  |
|        | $C_{\alpha 2}H$   | 3.49  | 0.18  | 3.5   | -0.05 | 0.03  |
| Ala139 | NH                | 7.86  | 0.28  | 7.82  | 0.04  | 0.00  |
|        | $C_{\alpha}H$     | 4.92  | 0.44  | 4.82  | 0.10  | 0.03  |
|        | $C_{\beta}H_3$    | 1.42  | 0.44  | 1.36  | 0.06  | 0.00  |
| Arg140 | NH                | 12.50 | 0.34  | 12.34 | 0.16  | 0.01  |
|        | $C_{\alpha}H$     | 4.21  | 0.40  | 4.18  | 0.03  | -0.01 |
|        | $C_{\beta 2}H$    | 1.87  | 0.33  | 1.84  | 0.03  | 0.00  |
|        | $N_{\epsilon}H$   | 10.10 | -0.15 | 9.93  | 0.17  | 0.01  |
| His141 | NH                | 11.00 | 0.48  | 10.91 | 0.09  | 0.02  |
|        | $C_{\alpha}H$     | 4.57  | 0.60  | 4.46  | 0.09  | 0.00  |
|        | $C_{\epsilon 1}H$ | 7.97  | 0.45  | 7.78  | 0.19  | 0.12  |
|        | $C_{\delta 2}H$   | 6.98  | 0.90  | 6.75  | 0.23  | 0.12  |
|        | $N_{\delta 1}H$   | 13.75 | 0.46  | 13.56 | 0.19  | 0.06  |
| Leu142 | NH                | 7.38  | 0.78  | 7.23  | 0.15  | -0.01 |
|        | $C_{\alpha}H$     | 5.42  | 1.70  | 5.30  | 0.12  | -0.00 |
| Ala143 | NH                | 6.38  | 0.78  |       |       | -0.06 |
|        | $C_{\alpha}H$     | 4.30  | 0.73  |       |       | -0.09 |
|        | $C_{\beta}H_3$    | 1.32  | 0.52  |       |       | -0.04 |
| Asp147 | NH                | 11.05 | 0.18  | 11.04 | 0.01  | -0.01 |
|        | $C_{\beta 1}H$    | 2.78  | 0.07  | 2.74  | 0.04  | 0.03  |
|        | $C_{\beta 2}H$    | 2.97  | 0.11  | 2.94  | 0.03  | 0.00  |



|        |                   |       |       |       |       |       |
|--------|-------------------|-------|-------|-------|-------|-------|
| Trp153 | $C_{\alpha}H$     | 4.52  | -0.20 | 4.34  | 0.18  | 0.13  |
|        | $C_{\delta 1}H$   | 6.77  | -0.55 | 6.37  | 0.40  | 0.33  |
|        | $N_{\epsilon 1}H$ | 9.45  | -0.85 | 8.67  | 0.78  | 0.48  |
|        | $C_{\epsilon 3}H$ | 7.20  | -0.42 | 7.09  | 0.11  | 0.17  |
|        | $C_{\zeta 2}H$    | 6.92  | -1.13 | 6.43  | 0.49  | 0.45  |
|        | $C_{\zeta 3}H$    | 5.86  | -0.85 | 5.87  | -0.01 | 0.10  |
|        | $C_{\eta 2}H$     | 6.24  | -1.25 | 6.09  | 0.15  | 0.19  |
| Val157 | NH                | 8.39  | -0.25 | 8.28  | 0.11  | 0.10  |
|        | $C_{\alpha}H$     | 2.70  | -0.30 | 2.65  | 0.05  | 0.09  |
|        | $C_{\beta}H$      | 1.40  | -0.27 | 1.28  | 0.12  | 0.12  |
|        | $C_{\gamma 1}H_3$ | 0.24  | -0.27 | 0.05  | 0.19  | 0.12  |
|        | $C_{\gamma 2}H_3$ | -0.35 | -0.44 | -0.42 | 0.07  | 0.19  |
| Asn161 | $N_{\delta 1}H$   | 7.25  | -0.14 | 7.22  | 0.03  | 0.04  |
|        | $N_{\delta 2}H$   | 6.24  | -0.16 | 6.16  | 0.08  | 0.06  |
| Ala180 | NH                | 8.08  | -0.24 | 8.28  | -0.20 | -0.22 |
|        | $C_{\alpha}H$     | 2.12  | -0.38 | 2.28  | -0.16 | -0.17 |
|        | $C_{\beta}H_3$    | -0.08 | -0.56 | 0.26  | -0.34 | -0.30 |
| Phe181 | NH                | 7.45  | -0.32 | 7.82  | -0.37 | -0.36 |
|        | $C_{\delta}H_s$   | 6.39  | -0.30 | 7.25  | -0.86 | -0.71 |
|        | $C_{\epsilon}H$   | 5.85  | -0.88 | 7.72  | -2.42 | -2.43 |
|        | $C_{\zeta}H$      |       | 0.21  | 8.87  |       | -2.85 |
| Phe183 | NH                | 8.27  | -0.25 | 8.39  | -0.12 | -0.12 |
|        | $C_{\beta}H$      | 3.04  | 0.34  | 3.09  | -0.05 | -0.11 |
|        | $C_{\beta}H'$     | 3.43  | 0.23  | 3.48  | -0.05 | -0.06 |
|        | $C_{\delta}H_s$   | 7.32  | -0.27 | 7.36  | -0.04 | -0.04 |
|        | $C_{\epsilon}H_s$ | 7.13  | -0.21 | 7.11  | 0.02  | -0.01 |
|        | $C_{\zeta}H$      | 6.75  | -0.18 | 6.77  | -0.02 | 0.00  |

|        |                                |       |       |       |       |       |
|--------|--------------------------------|-------|-------|-------|-------|-------|
| Tyr184 | NH                             | 7.93  | -0.49 | 7.97  | -0.04 | -0.10 |
|        | C <sub>β</sub> H               | 2.40  | -0.87 | 2.44  | -0.04 | 0.01  |
|        | C <sub>β</sub> H               | 1.96  | -0.97 | 1.92  | 0.03  | 0.07  |
|        | C <sub>δ</sub> Hs              | 5.65  | -1.01 | 5.20  | 0.45  | 0.21  |
|        | C <sub>ε</sub> Hs              | 5.98  | -1.08 | 5.35  | 0.63  | 0.52  |
|        | O <sub>η</sub> H               | 8.23  | -0.73 | 7.44  | 0.79  | 0.69  |
| Val187 | NH                             | 7.79  | -0.26 | 7.73  | 0.06  | 0.04  |
|        | C <sub>α</sub> H               | 3.24  | -0.19 | 3.13  | 0.11  | 0.05  |
|        | C <sub>β</sub> H               | 1.23  | -0.33 | 1.11  | 0.12  | 0.08  |
|        | C <sub>γ1</sub> H <sub>3</sub> | 0.54  | -0.22 | 0.45  | 0.09  | 0.08  |
|        | C <sub>γ2</sub> H <sub>3</sub> | -0.12 | -0.23 | -0.18 | 0.06  | 0.03  |
| His207 | C <sub>α</sub> H               | 3.80  |       | 4.04  |       |       |
|        | C <sub>β</sub> H               | 1.64  |       | 2.22  |       |       |
|        | C <sub>β</sub> H'              | 1.89  |       | 2.43  |       |       |
|        | C <sub>δ</sub> H               | 6.16  |       | 6.81  |       |       |
| Arg208 | C <sub>α</sub> H               | 3.83  |       | 3.84  |       |       |

\*In <sup>1</sup>H<sub>2</sub>O 50 mM in phosphate, pH 7.1 at 25°C.

†Chemical shifts, in ppm, referenced to DSS via the solvent resonance.

‡Dipolar shift, in ppm, at 25°C for *Nm*HO-PH-N<sub>3</sub>, calculated by the optimized orientation and anisotropies of the paramagnetic susceptibility tensor as described in Figure 6.

¶Chemical shift, in ppm, referenced to DSS, as reported previously (Y. Liu, X. Zhang, T. Yoshida, G. N. La Mar, *Biochemistry* 43 (2004) 10112-10126).

§ $\Delta\delta_{\text{DSS}}(\text{obs})$ , as described in Eq. (5).

|| $\Delta\delta_{\text{dip}}(\text{calc})$ , as described in Eq. (4).

\*\*Possesses large contribution from contact shifts.

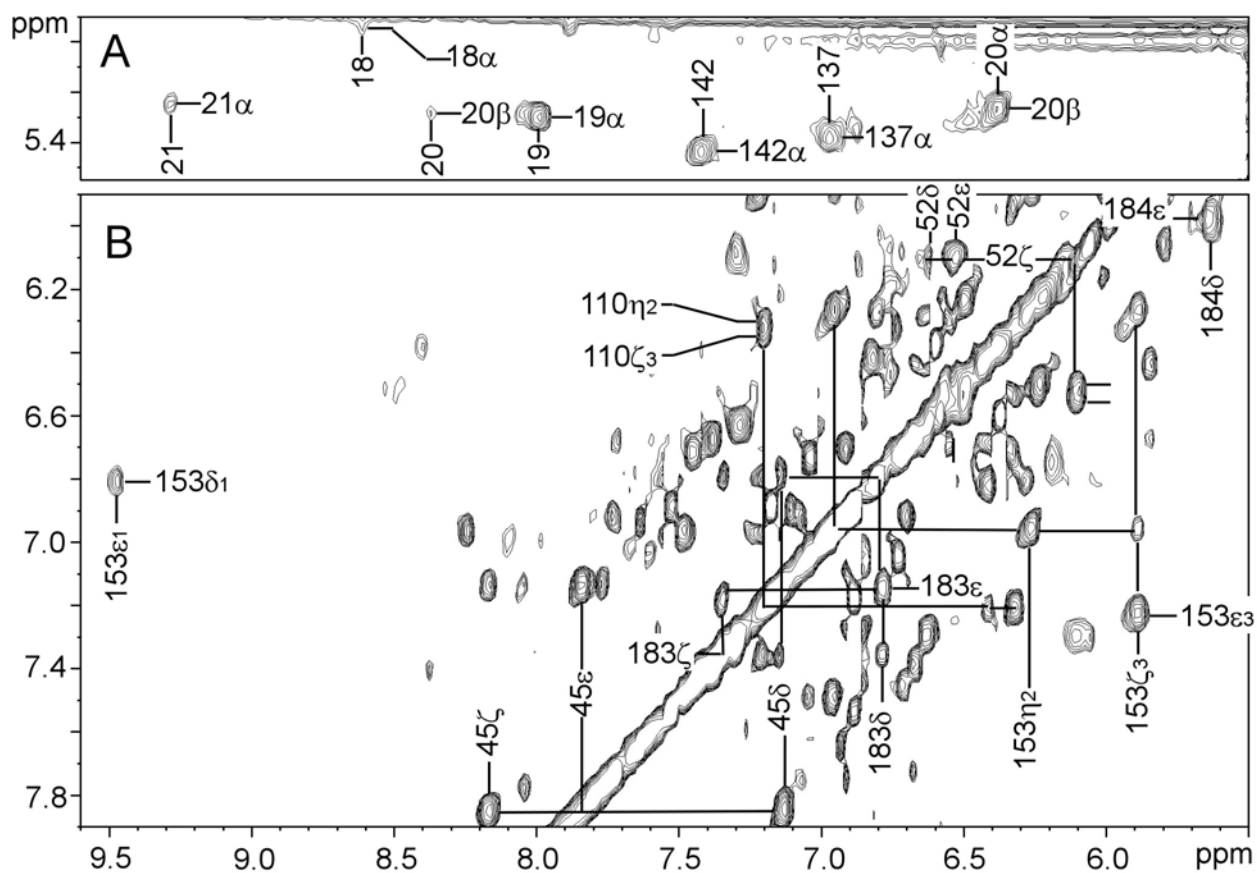

**Figure S1.** Portions of the lowfield 500 MHz  $^1\text{H}$  NMR TOCSY spectrum (mixing time 28 ms, repetition rate  $1\text{ s}^{-1}$ ) for *NmHO-PH-N<sub>3</sub>* in  $^1\text{H}_2\text{O}$ , 50 mM phosphate, pH 7.1 at  $25^\circ\text{C}$ , illustrating scalar connections: (A) within hyperfine shifted proximal helix residues Asp18-Ala21, His137 and Leu142; and (B) aromatic rings of Phe45, Phe52, Trp110, Phe123, Trp153, Phe156 and Phe183.

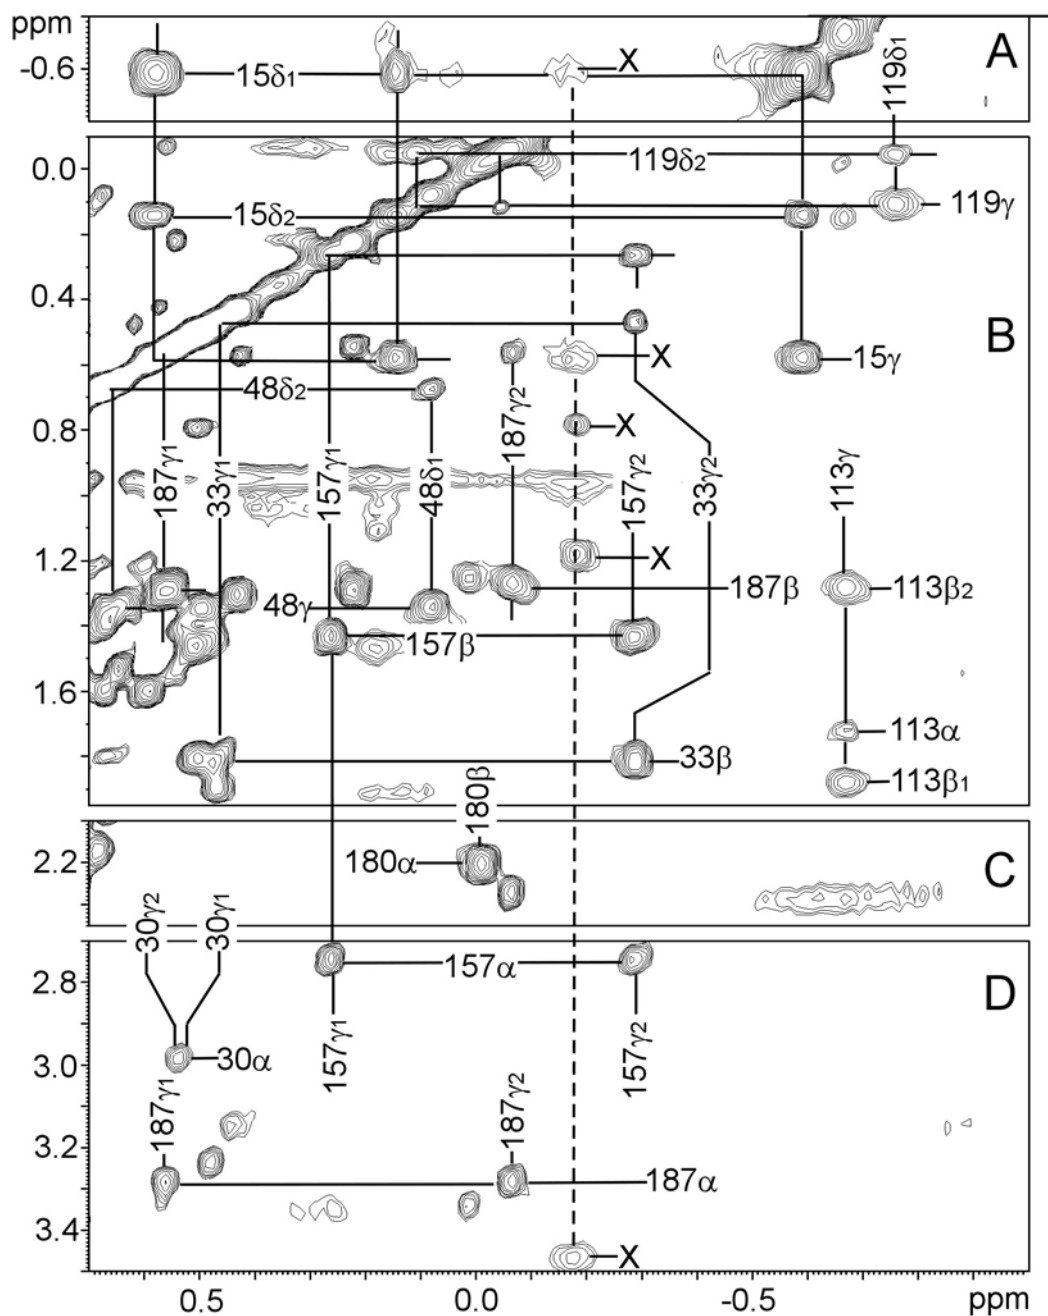

**Figure S2.** Upfield portions of the 500 MHz  $^1\text{H}$  NMR TOCSY spectrum (mixing time 30 ms, repetition rate  $1\text{ s}^{-1}$ ) of *NmHO-PH-N<sub>3</sub>* in  $^1\text{H}_2\text{O}$ , 50 mM in phosphate, pH 7.1 at  $34^\circ\text{C}$ , illustrating the scalar contacts for the aliphatic side chains for: Leu15 (**A**, **B**), an unidentified, exchange broadened residue X with peaks marked X (**A**, **B**, **D**), Val33, Leu48, Cys113 and Leu119 (**B**); Ala180 (**C**) and Val30 (**D**); and Val157 and Val187 (**B**,**D**).

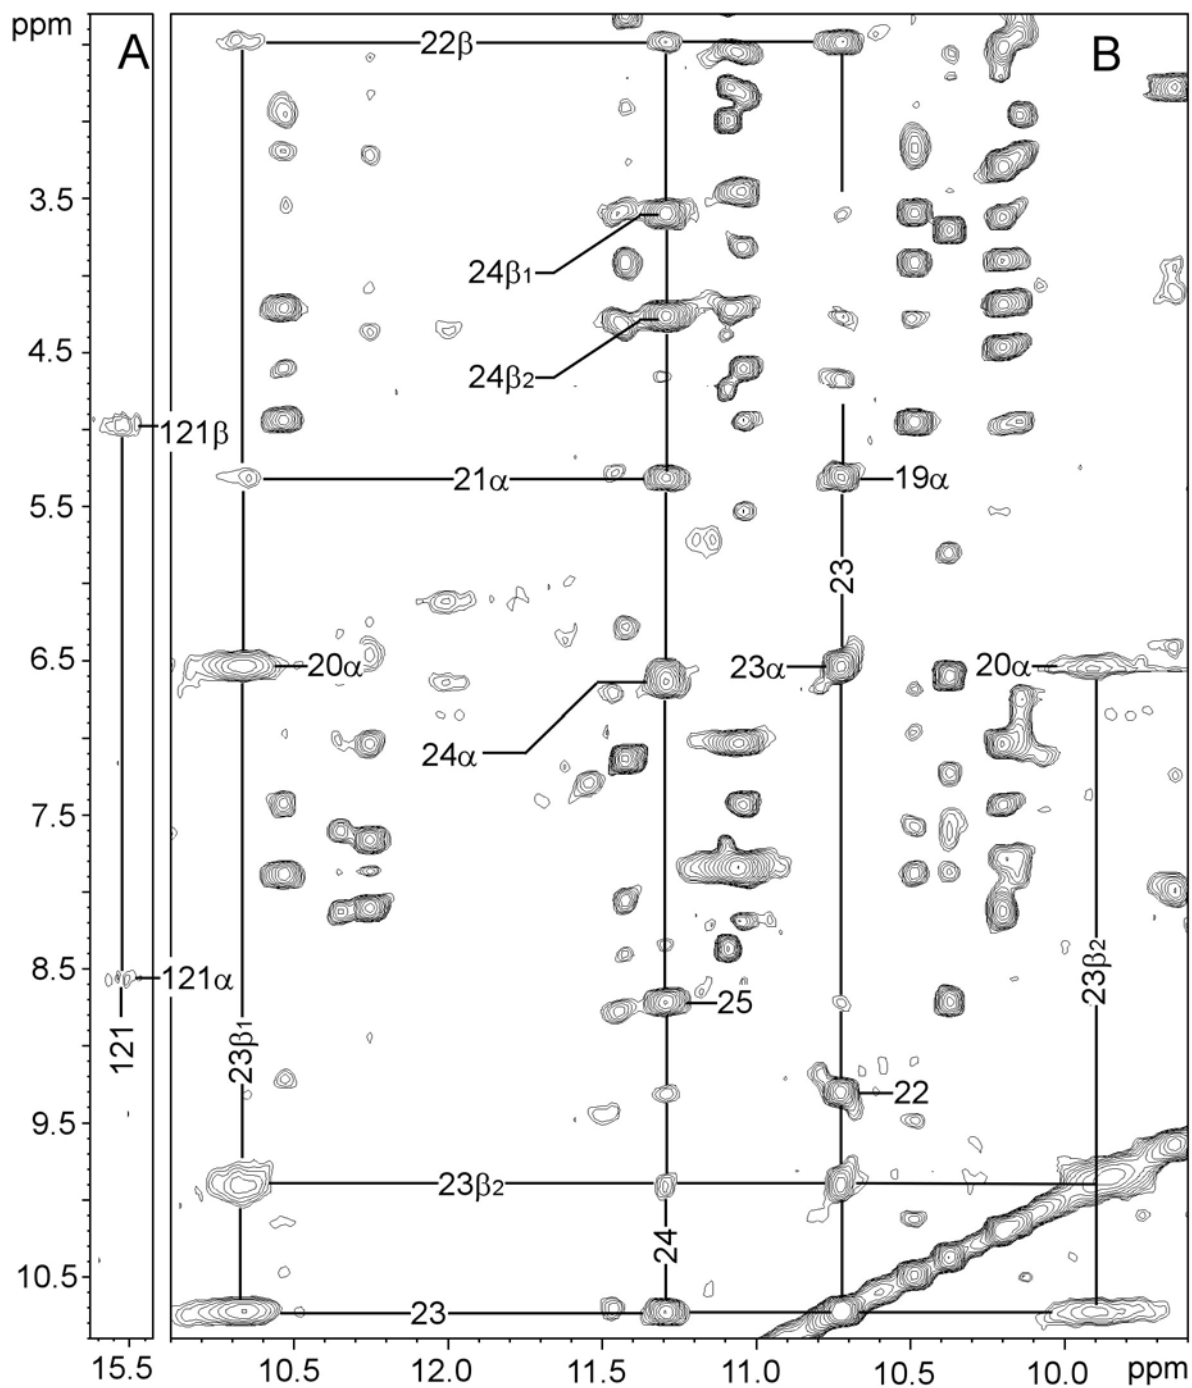

**Figure S3.** (A) Portions of the 600 MHz  $^1\text{H}$  NOESY spectrum (mixing time 40 ms, repetition rate  $2\text{ s}^{-1}$ ) of *NmHO-PH-N<sub>3</sub>* in  $^1\text{H}_2\text{O}$ , 50 mM phosphate, pH 7.0 at 25°C, illustrating key contacts for the relaxed resonances (A) Ala121, and (B) the low-field shifted backbone of the axial His23 and its sequential contacts to Asp24  $\text{C}_\alpha\text{H}$  and Thr20.

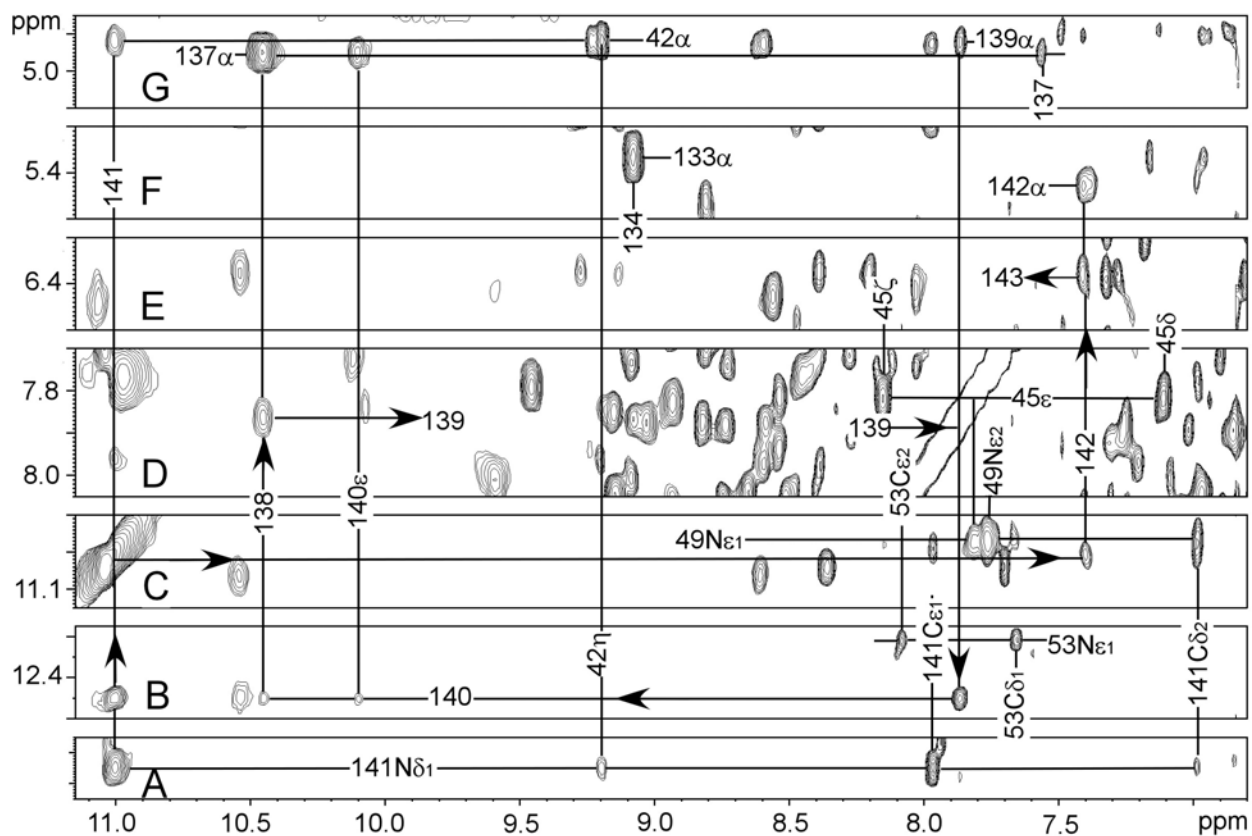

**Figure S4.** Portions of the 600 MHz  $^1\text{H}$  NMR NOESY spectrum illustrating: (A) the intra His141 and the expected Tyr42 to His141 contact; (B-F), the sequential  $\text{N}_i\text{-N}_{i+1}$  contacts for Gly138 - Ala143, and (B), intra-His53 ring and intra-Gln49  $\text{N}_\epsilon\text{H}_2$  contacts and (C) the Phe45 to Gln49 contact.

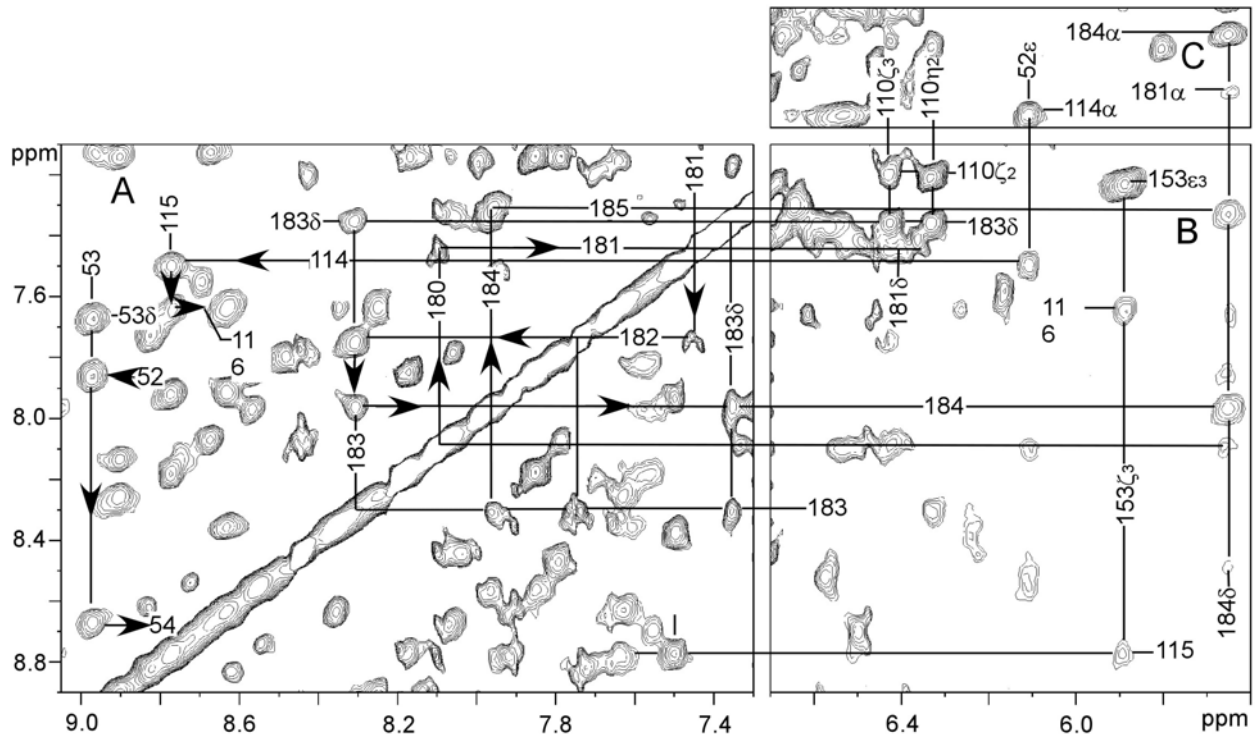

**Figure S5.** Portions of the 600 MHz  $^1\text{H}$  NMR NOESY spectrum (mixing time 40 ms, repetition rate  $1\text{ s}^{-1}$ ) for *NmHO-PH-N<sub>3</sub>* in  $^2\text{H}_2\text{O}$ , 50 mM phosphate, pH 7.1 at  $25^\circ\text{C}$ , illustrating sequential helical  $\text{N}_i\text{-N}_{i+1}$  (**A**),  $\alpha_i\text{-N}_i$  (**C**) and  $\alpha_i\text{-N}_{i+3}$  (**D**) contacts for slowly exchanging peptide NHs involving residues Phe52-Ala55, Ala114-Gly116, Ala180-Lys185 and Val187, and the contacts between these NHs and aromatic rings (**B**, **D**). The sequential  $\text{N}_i\text{-N}_{i+1}$  for the three helical fragments are indicated by arrows.

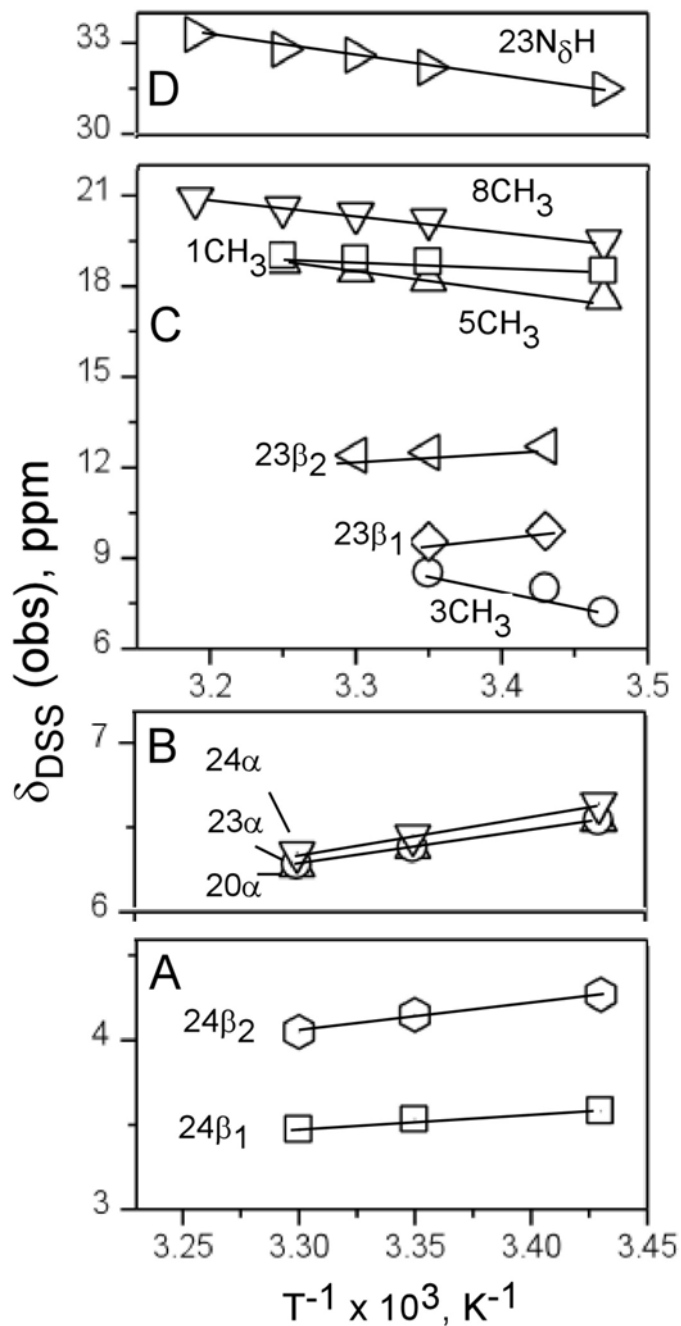

**Figure S6** Plot of  $\delta_{DSS}(\text{obs})$  versus reciprocal absolute temperature (Curie-plot) for the heme methyls, His23  $C\beta$ Hs and  $N\delta$ H, and non-ligated residue Thr20 and Asp24 protons for *NmHO-PH-N<sub>3</sub>*.
